# Supplementary material for: Integrated analysis of the prostate cancer small‐nucleolar transcriptome reveals SNORA55 as a driver of prostate cancer progression
Source: PubMed Central journal article supplement — Mol Oncol. 2015 Dec 22;10(5):693–703. doi: 10.1016/j.molonc.2015.12.010 (PMC5423162; doi:10.1016/j.molonc.2015.12.010), 2015-12-22
Supplement: MOL2-10-693-s002.pdf [file MOL2-10-693-s002.pdf]

Suppl. Table 1

| <b>Variable</b>                       | <b>Value</b> |
|---------------------------------------|--------------|
| Age, median $\pm$ SD<br>(years)       | 68 $\pm$ 7.4 |
| Follow-up median $\pm$ SD<br>(months) | 54 $\pm$ 7.6 |
| Pre-operative PSA (ng/ml)             |              |
| $\leq$ 10                             | 27 (62.8%)   |
| $>$ 10                                | 16 (37.2%)   |
| Gleason Score (percentage)            |              |
| 5 or 6                                | 12 (27.9%)   |
| 7                                     | 21 (48.8%)   |
| 8 or 9                                | 10 (23.3%)   |
| Pathologic Stage<br>(percentage)      |              |
| pT2                                   | 28 (65.1%)   |
| pT3                                   | 15 (34.9%)   |

Suppl. Table 2

| <b>Variable</b>               | <b>Value</b> |
|-------------------------------|--------------|
| Pre-operative PSA (ng/ml)     |              |
| ≤10                           | 7 (78%)      |
| >10                           | 2 (22%)      |
| Gleason Score (percentage)    |              |
| 5 or 6                        | 8 (11%)      |
| 7                             | 1 (89%)      |
| Pathologic Stage (percentage) |              |
| pT1                           | 2 (22%)      |
| pT2                           | 7 (78%)      |
