# Supplementary figures and images for: Integrated analysis of the prostate cancer small‐nucleolar transcriptome reveals SNORA55 as a driver of prostate cancer progression
Source: PubMed Central journal article supplement — Mol Oncol. 2015 Dec 22;10(5):693–703. doi: 10.1016/j.molonc.2015.12.010 (PMC5423162; doi:10.1016/j.molonc.2015.12.010), 2015-12-22

SUPPL. FIG. 1

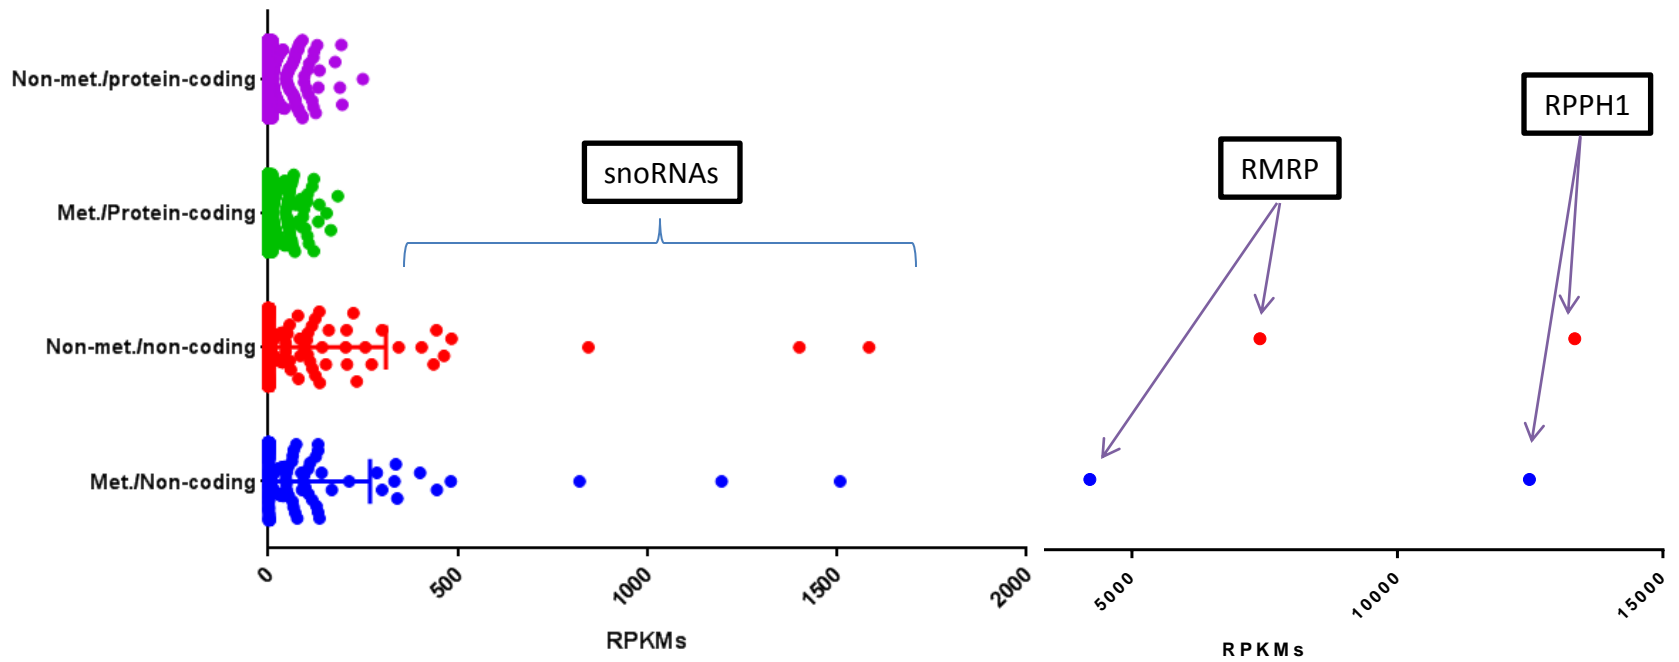

# SUPPL. FIG. 2

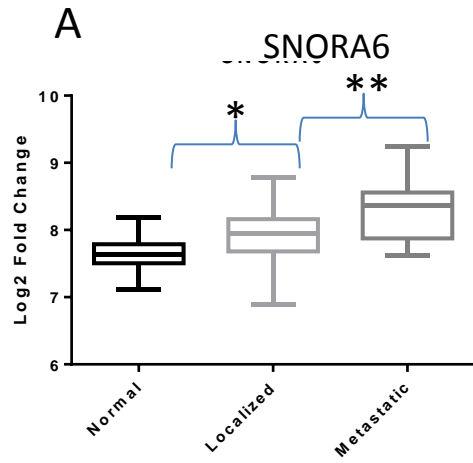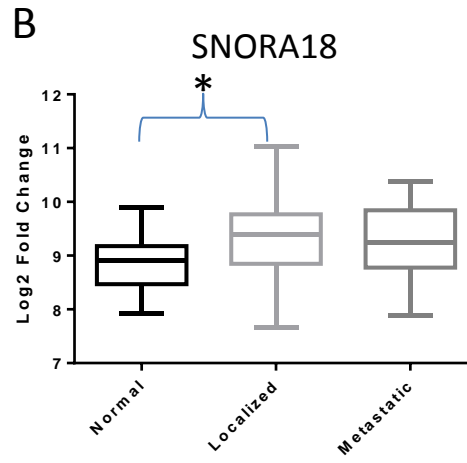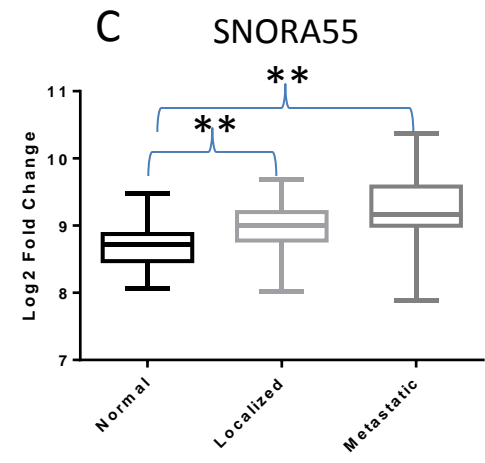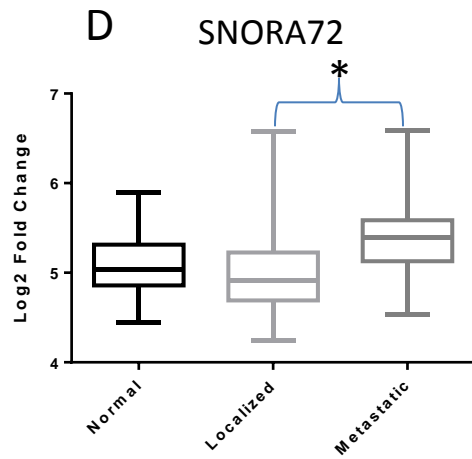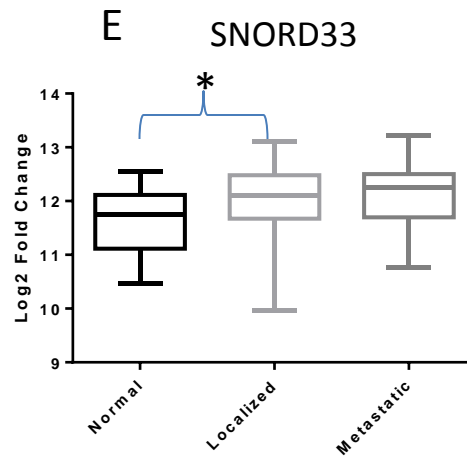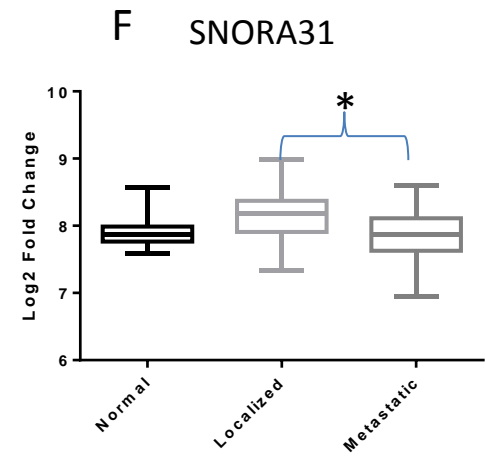

SUPPL. FIG. 3

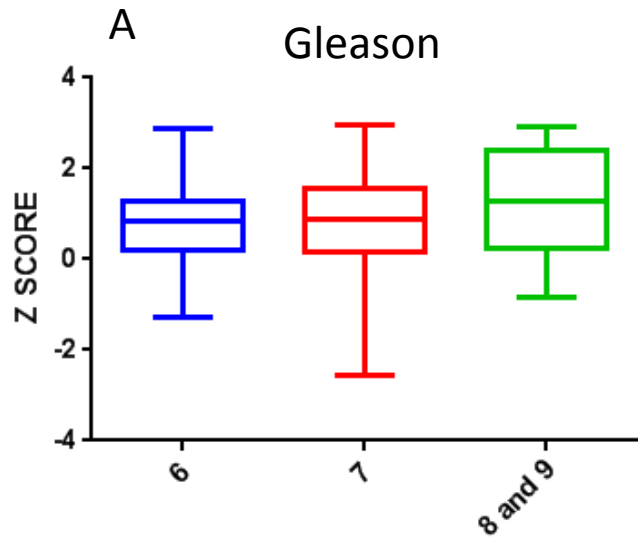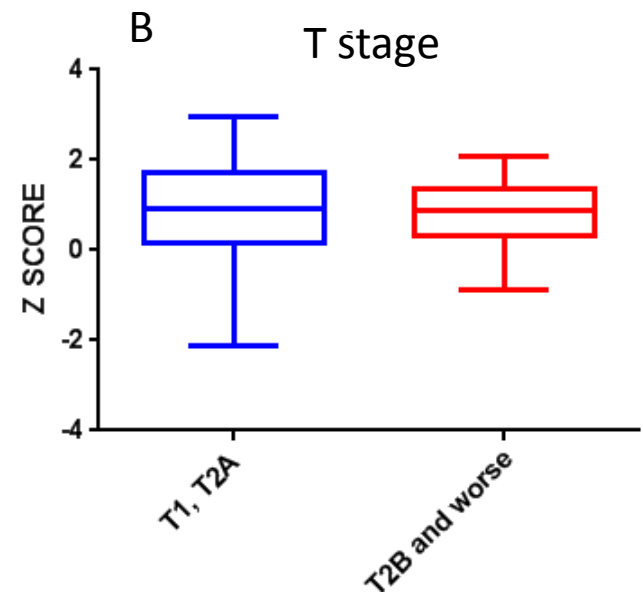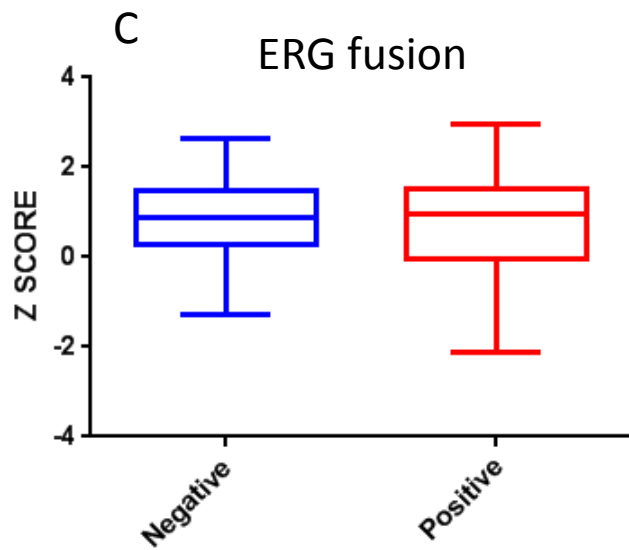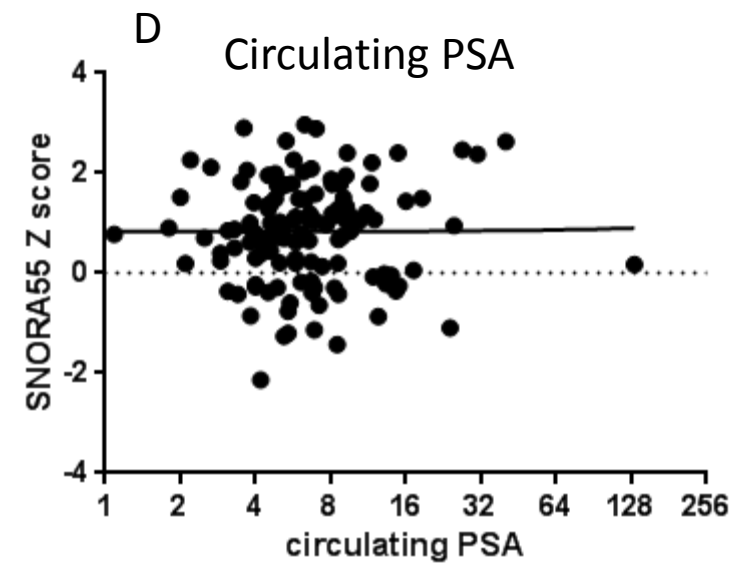

# SUPPL. FIG. 4

A

Pearson:-0.289; Spearman=-0.305

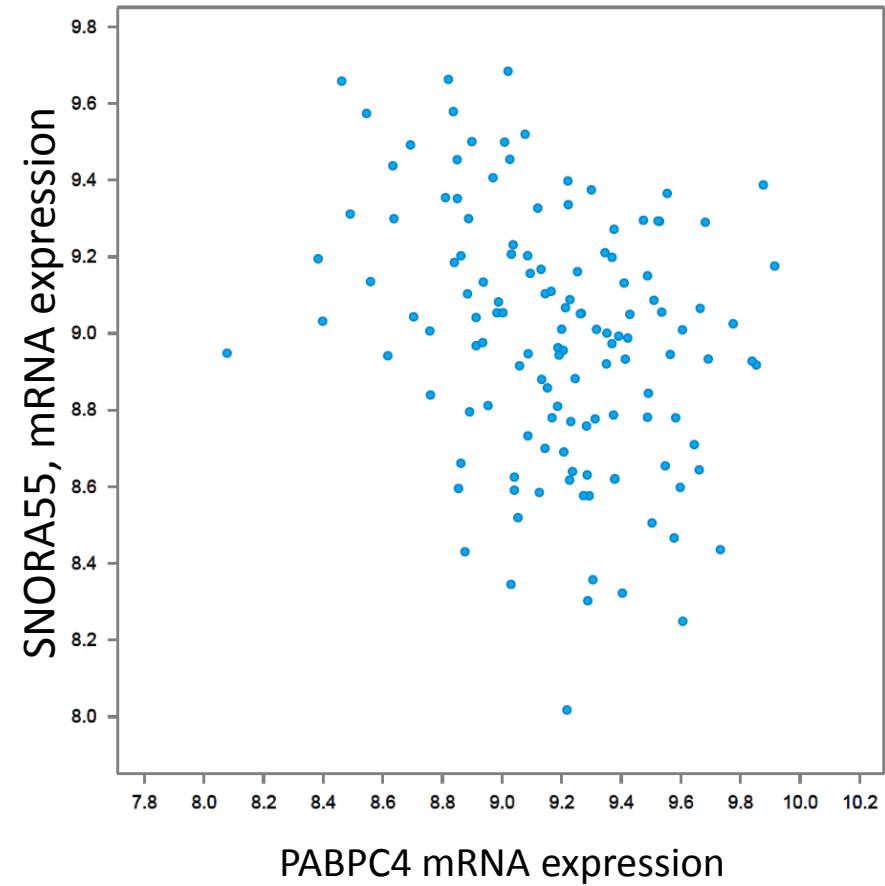

B

P=0.34

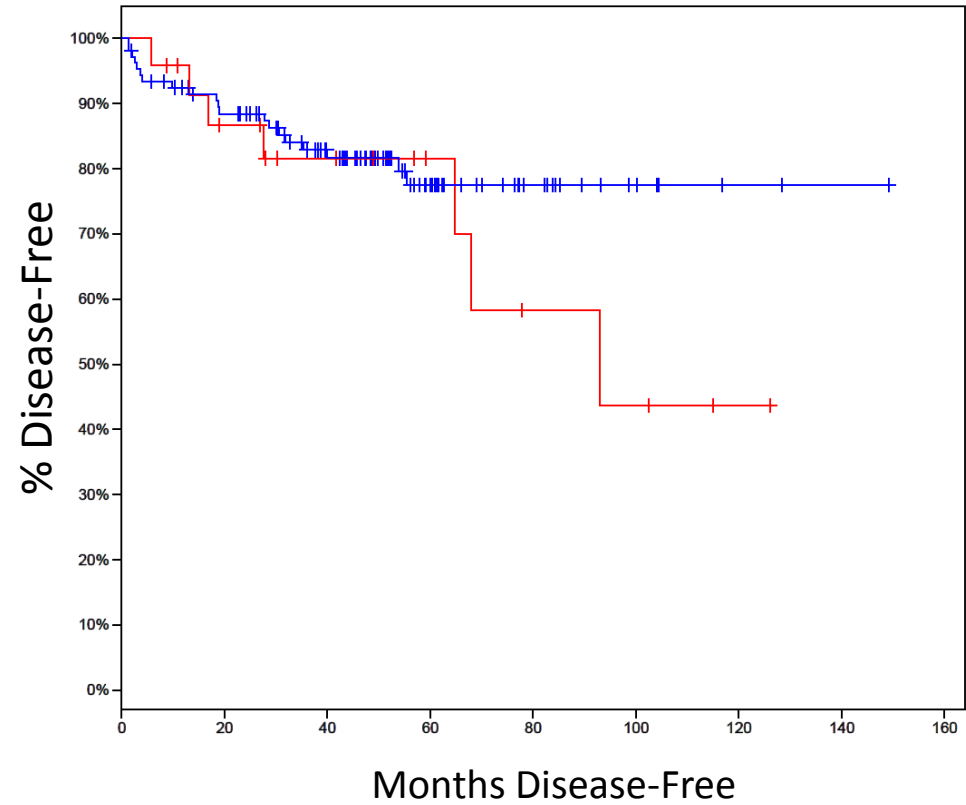

SUPPL. FIG. 5

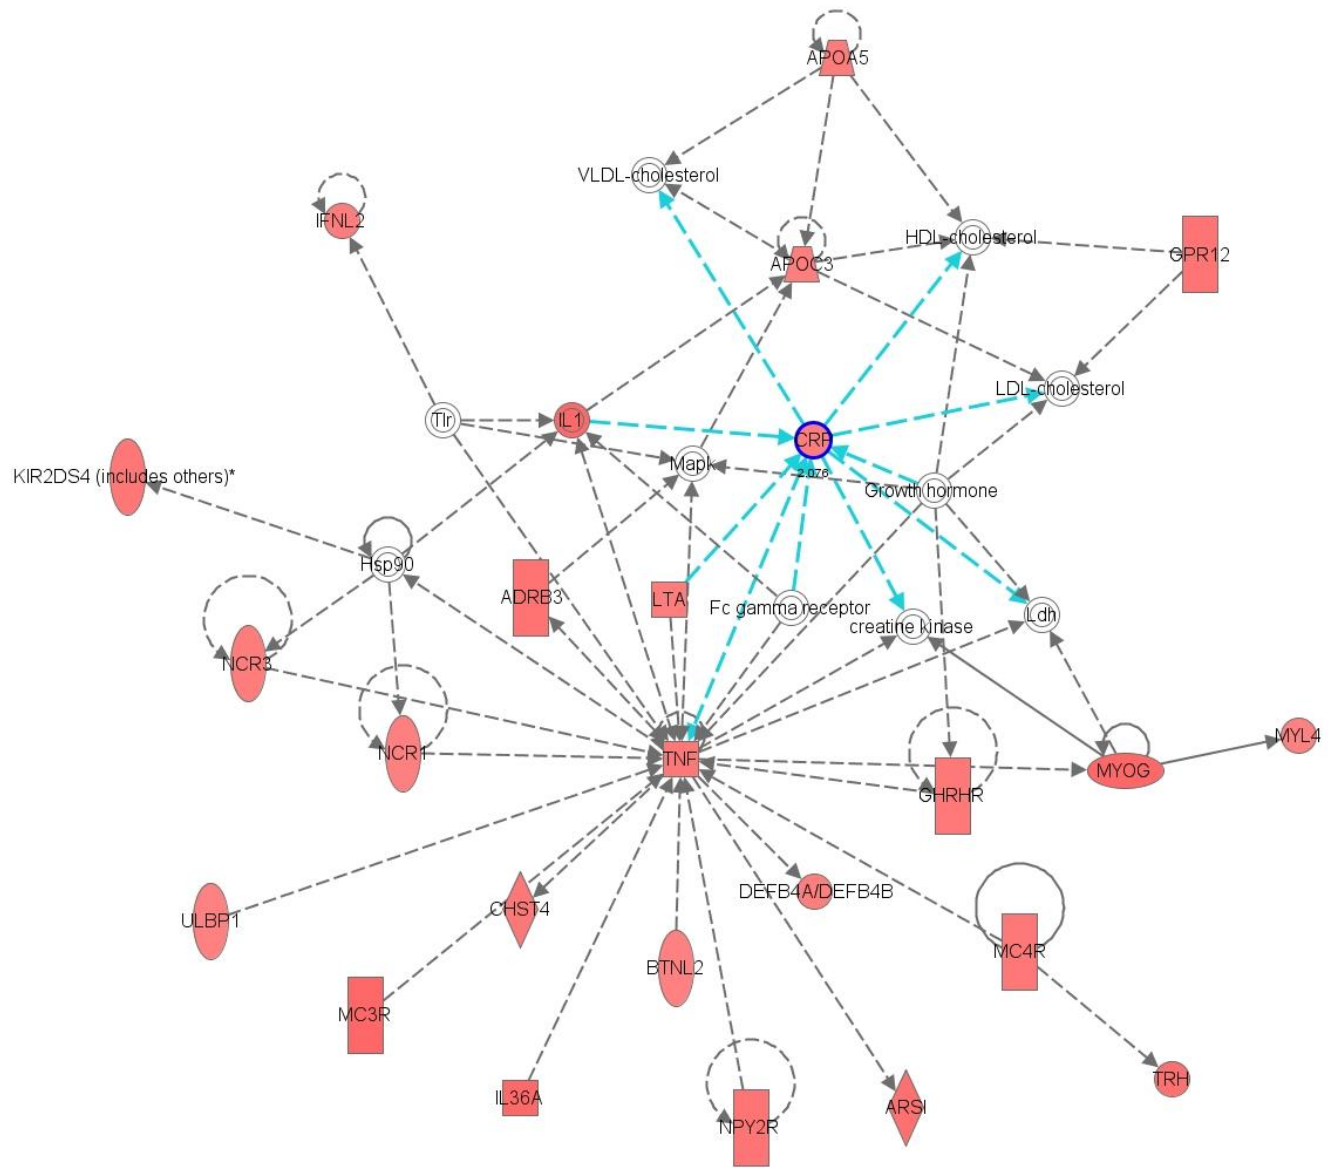

SUPPL. FIG. 6

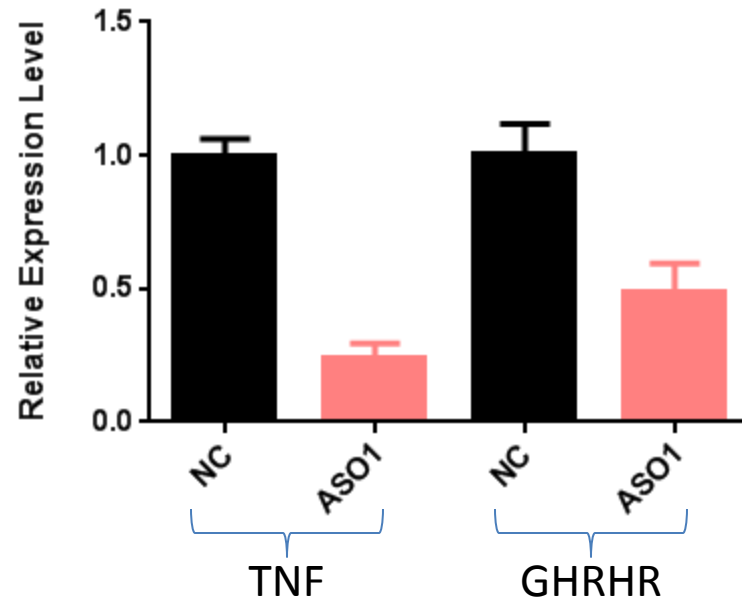

Supplement: MOL2-10-693-s001.pdf [file MOL2-10-693-s001.pdf]
